# Supplementary material for: The origin and early evolution of eukaryotes in the light of phylogenomics
Source: Springer Nature journal article supplement (doi:10.1186/gb-2010-11-5-209), 2010-01-01

**(a)** Yeast *Saccharomyces cerevisiae*

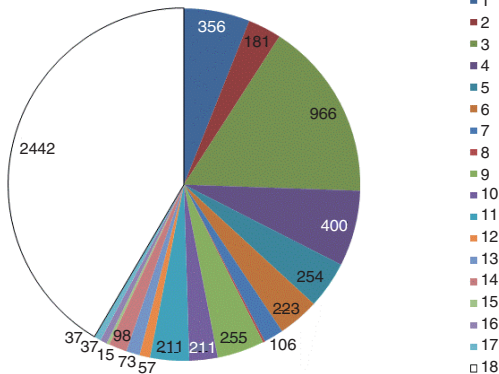

**(b)** Red alga *Cyanidioschyzon merolae*

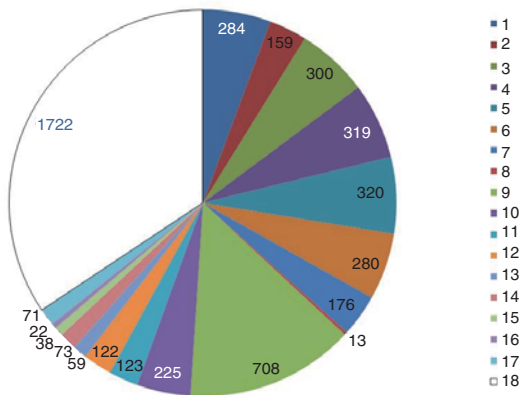

Supplement: 13059_2010_2422_MOESM2_ESM.pdf [file 13059_2010_2422_MOESM2_ESM.pdf]
